# Supplementary material for: Impact of Treatment Adherence and Inhalation Technique on asthma outcomes of Pediatric Patients: A Longitudinal Study
Source: bioRxiv or medRxiv preprint supplement (doi:10.1101/2023.11.30.23299186), 2023-11-30
Supplement: Supplementary file [file media-1.pdf]

## Supplementary Material

### S1. Multilevel models of asthma symptom control (linear) and exacerbation occurrence (logistic)

|                                  |                     | Asthma symptom control |                   | Exacerbation occurrence |                 |
|----------------------------------|---------------------|------------------------|-------------------|-------------------------|-----------------|
|                                  |                     | Model A                | Model B           | Model A                 | Model B         |
|                                  |                     | b (SE)                 |                   | OR (SE)                 |                 |
| <b>Intercept</b>                 |                     | 0.206 (0.221)          | 0.084 (0.177)     | 0.49 (0.54)             | 1.30 (0.60)     |
| <b>Time (years)</b>              |                     | 0.003 (0.003)          | 0.001 (0.002)     | 0.98 (0.01) *           | 0.98 (0.01) **  |
| <b>ADHERENCE</b>                 |                     |                        |                   |                         |                 |
| Average adherence                |                     | 0.002 (0.002)          | 0.001 (0.002)     | 1.00 (0.01)             | 0.99 (0.01)     |
| Current fluctuation of adherence |                     | 0.001 (0.001)          | 0.001 (0.001)     | 1.00 (0.00)             | 1.00 (0.00)     |
| Prior fluctuation of adherence   |                     | -0.003 (0.001) *       | -0.001 (0.001)    | 0.99 (0.00)             | 0.99 (0.00)     |
| <b>INHALATION TECHNIQUE</b>      |                     |                        |                   |                         |                 |
| Average IT                       |                     | 0.039 (0.038)          | 0.011 (0.030)     | 1.17 (0.09)             | 1.15 (0.10)     |
| Current fluctuation of IT        |                     | 0.014 (0.035)          | -0.003 (0.031)    | 0.99 (0.11)             | 0.96 (0.11)     |
| Prior fluctuation of IT          |                     | -0.036 (0.040)         | -0.045 (0.035)    | 1.16 (0.12)             | 1.15 (0.13)     |
| <b>Treatment</b>                 |                     |                        |                   |                         |                 |
|                                  | ICS plus LABA       | Ref.                   | Ref.              | Ref.                    | Ref.            |
|                                  | ICS                 | 0.127 (0.088)          | 0.091 (0.071)     | 0.93 (0.22)             | 0.84 (0.23)     |
| <b>Sex</b>                       |                     |                        |                   |                         |                 |
|                                  | Male                | Ref.                   | Ref.              | Ref.                    | Ref.            |
|                                  | Female              | 0.173 (0.082) *        | 0.133 (0.064) *   | 0.97 (0.19)             | 0.82 (0.20)     |
| <b>Age</b>                       |                     |                        |                   |                         |                 |
|                                  | < 8 years           | Ref.                   | Ref.              | Ref.                    | Ref.            |
|                                  | 8 – 11              | -0.079 (0.101)         | -0.045 (0.080)    | 0.43 (0.23) ***         | 0.39 (0.24) *** |
|                                  | ≥12                 | -0.038 (0.115)         | -0.003 (0.091)    | 0.38 (0.26) ***         | 0.31 (0.28) *** |
| <b>Reliever use</b>              |                     |                        |                   |                         |                 |
|                                  | Almost never        |                        | Ref.              |                         | Ref.            |
|                                  | Usually             |                        | 0.876 (0.061) *** |                         | 3.30 (0.21) *** |
| <b>Exacerbation</b>              |                     |                        |                   |                         |                 |
|                                  | No                  |                        | Ref.              |                         |                 |
|                                  | Yes                 |                        | 0.327 (0.064) *** |                         |                 |
| <b>Asthma symptom control</b>    |                     |                        |                   |                         |                 |
|                                  | Not well controlled |                        |                   |                         | Ref.            |
|                                  | Intermediate        |                        |                   |                         | 0.33 (0.35) **  |
|                                  | Well controlled     |                        |                   |                         | 0.37 (0.25) *** |
| ICC (linear); VPC (logistic)     |                     | 0.2332                 | 0.1498            | 0.0112                  | 0.0109          |
| logLikelihood                    |                     | -1194.0                | -1074.5           |                         |                 |
| AIC                              |                     | 2418.0                 | 2183.1            |                         |                 |
| BIC                              |                     | 2489.9                 | 2264.5            |                         |                 |
| -2 Res Log Pseudo-Likelihood     |                     |                        |                   | 4149.65                 | 4291.46         |
| Generalized Chi-Square           |                     |                        |                   | 751.82                  | 748.04          |
| Generalized Chi-Square / DF      |                     |                        |                   | 0.85                    | 0.85            |

The p-values corresponding to each coefficient or OR provided by the models were marked with asterisks: \*(p<0.05); \*\*(p<0.01); \*\*\* (p<0.001).

ANOVA p-values for each independent variable were marked with § ( $p < 0.05$ ). ICS: Inhaled Corticosteroids; ICS plus LABA: Inhaled Corticosteroids plus Long-Acting Beta-Agonists; ICC: Intraclass Correlation Coefficient; VPC: Variance Partition Coefficients; AIC: Akaike Information Criterion; BIC: Bayesian Information Criterion.

## S2. Multilevel models of Health-Related Quality of Life measured with the EQ-5D and PROMIS-PAIS (linear)

|                                  |                     | EQ-5D             |                   | PROMIS-PAIS        |                    |
|----------------------------------|---------------------|-------------------|-------------------|--------------------|--------------------|
|                                  |                     | Model A           | Model B           | Model A            | Model B            |
|                                  |                     | b (SE)            |                   | b (SE)             |                    |
| <b>Intercept</b>                 |                     | 0.964 (0.038) *** | 0.970 (0.040) *** | 11.425 (2.006) *** | 12.441 (2.028) *** |
| <b>Time (years)</b>              |                     | 0.000 (0.001)     | 0.000 (0.001)     | -0.026 (0.028)     | -0.023 (0.027)     |
| <b>ADHERENCE</b>                 |                     |                   |                   |                    |                    |
| Average adherence                |                     | 0.000 (0.000)     | 0.000 (0.000)     | 0.023 (0.020)      | 0.023 (0.018)      |
| Current fluctuation of adherence |                     | 0.000 (0.000)     | 0.000 (0.000)     | 0.000 (0.009)      | -0.004 (0.009)     |
| Prior fluctuation of adherence   |                     | 0.000 (0.000)     | 0.000 (0.000)     | -0.015 (0.010)     | -0.006 (0.010)     |
| <b>INHALATION TECHNIQUE</b>      |                     |                   |                   |                    |                    |
| Average IT                       |                     | 0.005 (0.006)     | 0.006 (0.006)     | -0.528 (0.356)     | -0.558 (0.334)     |
| Current fluctuation of IT        |                     | -0.013 (0.006) *  | -0.012 (0.006) *  | -0.323 (0.316)     | -0.363 (0.312)     |
| Prior fluctuation of IT          |                     | 0.017 (0.007) *   | 0.017 (0.007) *   | -0.054 (0.350)     | 0.051 (0.346)      |
| <b>Treatment</b>                 |                     |                   |                   |                    |                    |
|                                  | ICS plus LABA       | Ref.              | Ref.              | Ref.               | Ref.               |
|                                  | ICS                 | -0.001 (0.016)    | -0.001 (0.016)    | -0.133 (0.863)     | -0.033 (0.814)     |
| <b>Sex</b>                       |                     |                   |                   |                    |                    |
|                                  | Male                | Ref.              | Ref.              | Ref.               | Ref.               |
|                                  | Female              | -0.032 (0.014) *  | -0.033 (0.014) *  | 2.384 (0.779) **   | 2.512 (0.729) ***  |
| <b>Age</b>                       |                     |                   |                   |                    |                    |
|                                  | < 8 years           | Ref.              | Ref.              | Ref.               | Ref.               |
|                                  | 8 - 11              | 0.001 (0.017)     | -0.004 (0.017)    | -0.400 (0.931)     | -0.140 (0.879)     |
|                                  | ≥ 12                | 0.002 (0.020)     | -0.002 (0.020)    | 2.462 (1.111) *    | 2.727 (1.051) *    |
| <b>Asthma symptom control</b>    |                     |                   |                   |                    |                    |
|                                  | Not well controlled |                   | Ref.              |                    | Ref.               |
|                                  | Intermediate        |                   | -0.006 (0.018)    |                    | 0.181 (0.995)      |
|                                  | Well controlled     |                   | 0.009 (0.014)     |                    | -2.250 (0.800) **  |
| <b>Reliever use</b>              |                     |                   |                   |                    |                    |
|                                  | No                  |                   | Ref.              |                    | Ref.               |
|                                  | Yes                 |                   | -0.017 (0.011)    |                    | 1.386 (0.621) *    |
| <b>Exacerbation</b>              |                     |                   |                   |                    |                    |
|                                  | No                  |                   | Ref.              |                    | Ref.               |
|                                  | Yes                 |                   | -0.018 (0.011)    |                    | -0.154 (0.570)     |
| ICC (linear)                     |                     | 0.6223            | 0.6192            | 0.5512             | 0.5130             |
| logLikelihood                    |                     | 350.6             | 341.8             | -1518.3            | -1518.3            |
| AIC                              |                     | -667.2            | -641.5            | 3104.2             | 3078.6             |
| BIC                              |                     | -596.6            | -554.5            | 3175.4             | 3166.3             |

The p-values corresponding to each coefficient provided by the models were marked with asterisks: \*(p<0.05); \*\*(p<0.01); \*\*\*(p<0.001). ANOVA p-values for each independent variable were marked with § (p<0.05).

ICS: Inhaled Corticosteroids; ICS plus LABA: Inhaled Corticosteroids plus Long-Acting Beta-Agonists; ICC: Intraclass Correlation Coefficient; VPC: Variance Partition Coefficients; AIC: Akaike Information Criterion; BIC: Bayesian Information Criterion.
